# Supplementary material for: A green process for the production of butanol from butyraldehyde using alcohol dehydrogenase: process details
Source: Royal Society of Chemistry journal article supplement (doi:10.1039/c3ra47821a), 2014-01-01
Supplement: c3ra47821a1.pdf [file c3ra47821a1.pdf]

**Fig. 1.** Standard run on GC with 20 mM of each acetaldehyde, butyraldehyde, ethanol and butanol showing retention time of 1.253, 2.216, 2.782 and 5.618 min, respectively.

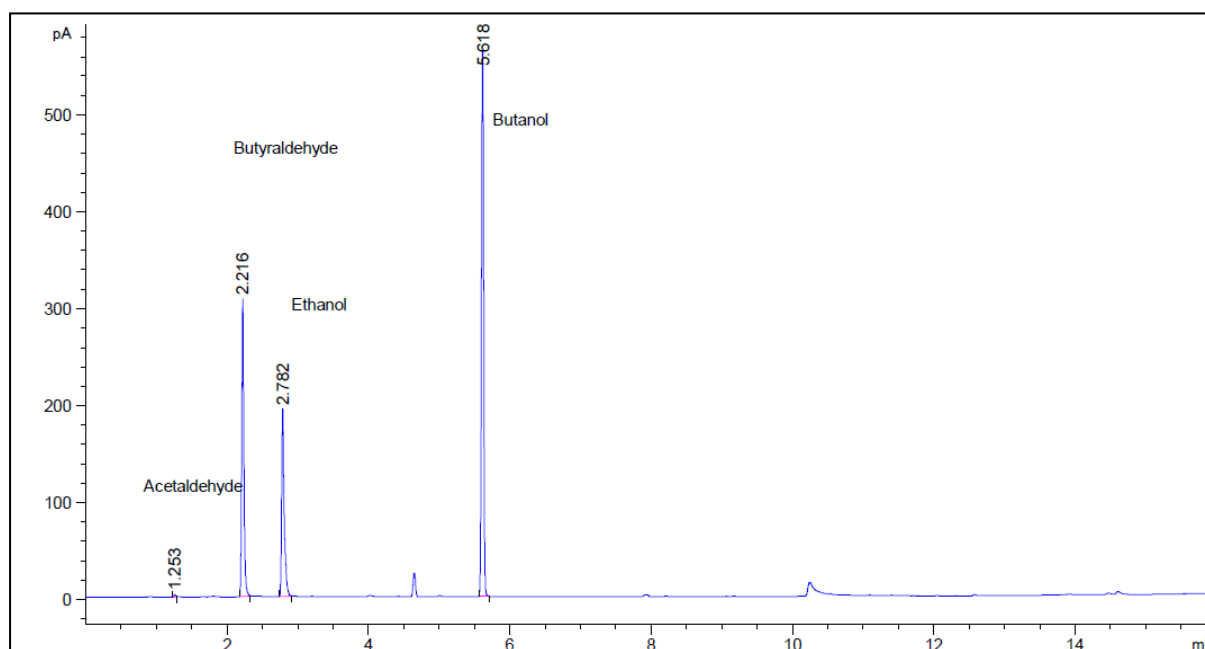

| Peak # | RetTime [min] | Type | Width [min] | Area [pA*s] | Height [pA] | Area %   |
|--------|---------------|------|-------------|-------------|-------------|----------|
| 1      | 1.253         | BB   | 0.0234      | 3.77021     | 2.38594     | 0.16128  |
| 2      | 2.216         | BB   | 0.0330      | 655.65540   | 306.03186   | 28.04745 |
| 3      | 2.782         | BB   | 0.0362      | 481.87115   | 192.77574   | 20.61336 |
| 4      | 5.618         | BB   | 0.0339      | 1196.36780  | 560.50897   | 51.17791 |

**Fig. 2.** The reaction for optimization of ratio of butyraldehyde to ethanol for the production of butanol with ratio 2:1.

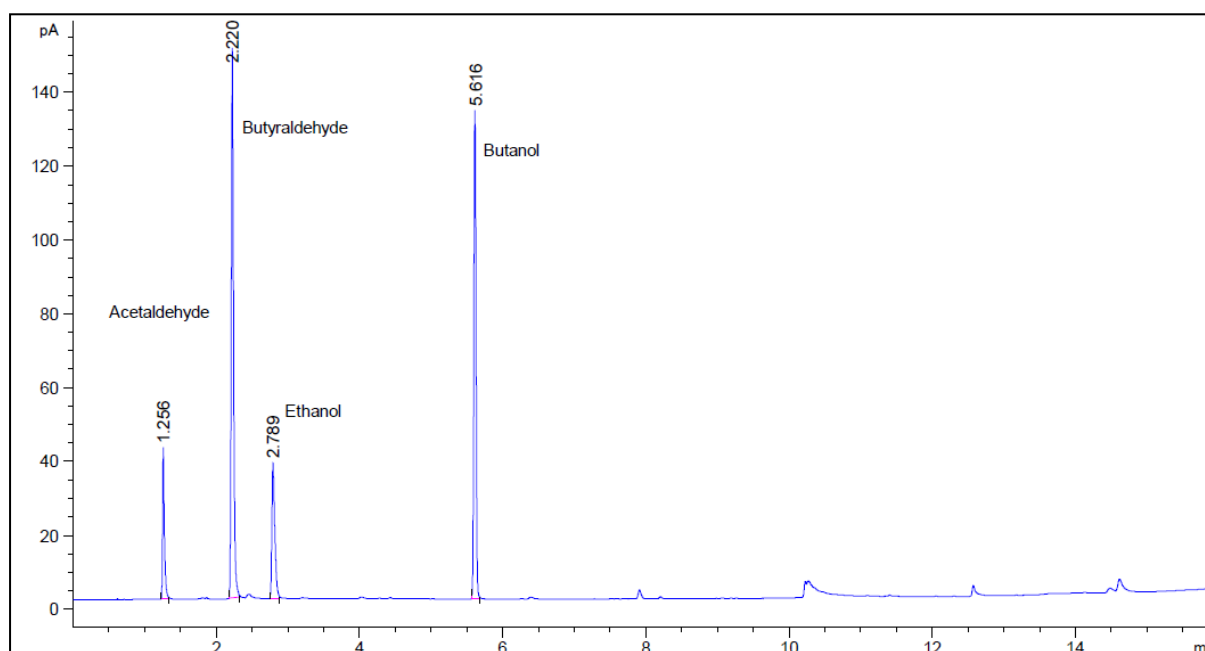

| Peak # | RetTime [min] | Type | Width [min] | Area [pA*s] | Height [pA] | Area %   |
|--------|---------------|------|-------------|-------------|-------------|----------|
| 1      | 1.256         | BB   | 0.0256      | 72.24192    | 40.82387    | 9.20798  |
| 2      | 2.220         | BB   | 0.0340      | 331.63852   | 148.70483   | 42.27076 |
| 3      | 2.789         | BB   | 0.0420      | 103.62764   | 36.59353    | 13.20841 |
| 4      | 5.616         | BB   | 0.0334      | 277.04971   | 132.23482   | 35.31285 |
